# Supplementary material for: Antifungal Activity and Biocontrol Potential of Simplicillium lamellicola JC-1 against Multiple Fungal Pathogens of Oilseed Rape
Source: MDPI journal article supplement (doi:10.3390/jof9010057), 2022-12-30
Supplement: s1 [file s1]

---

## SUPPLEMENTARY MATERIALS

### **Antifungal Activity and Biocontrol Potential of *Simplicillium lamellicola* JC-1 against Multiple Fungal Diseases of Oilseed Rape**

Wenting Li, Tao Luo, Juncheng Li, Jing Zhang, Mingde Wu, Long Yang and Guoqing Li\*

*State Key Laboratory of Agricultural Microbiology and Key Laboratory of Plant Pathology of  
Hubei Province, Huazhong Agricultural University, Wuhan 430070, China*

\*Corresponding author. guoqingli@mail.hzau.edu.cn

## SUPPLEMENTARY FIGURES

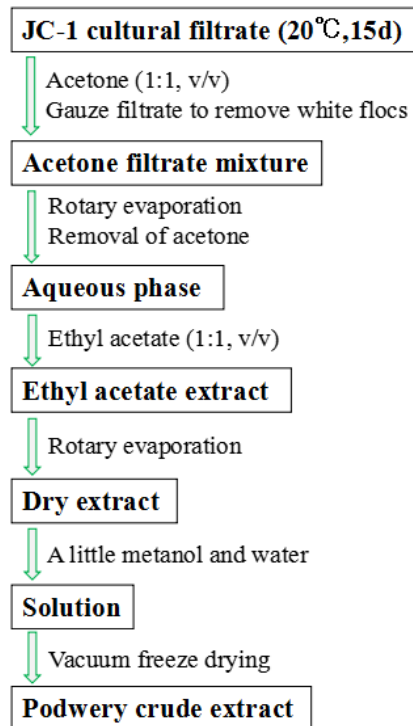

**Figure S1.** The procedure for obtaining the crude extract from the cultures of *Simplicillium lamellicola* JC-1 in potato dextrose broth.

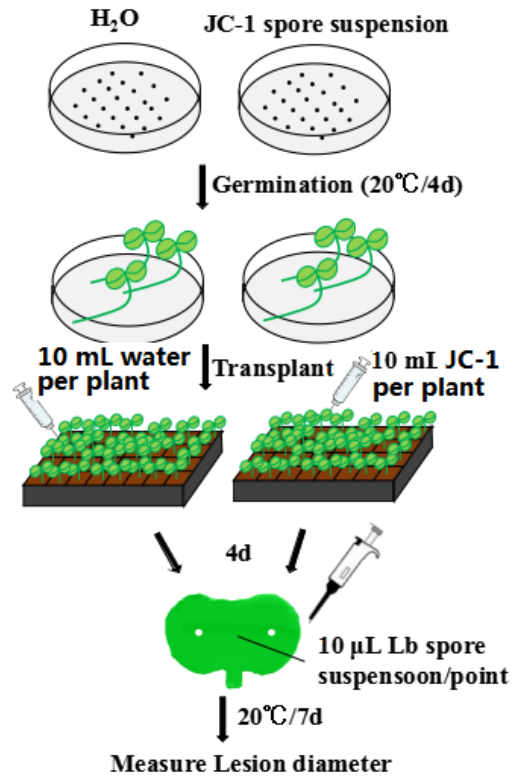

**Figure S2.** The procedure for determination of the induced systemic resistance of *S. lamellicola* JC-1 against infection by *L. biglobosa* in oilseed rape.

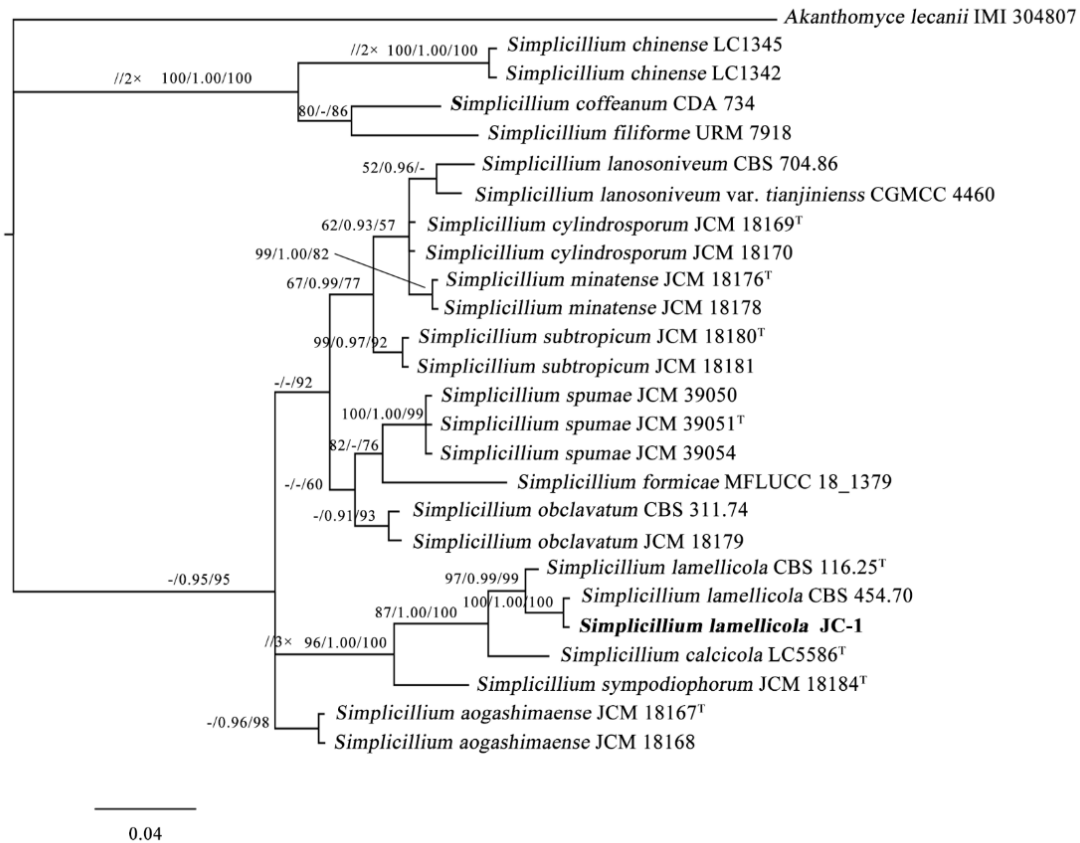

**Figure S3.** Phylogenetic tree of 26 fungal taxa in the genus *Simplicillium* and *Akanthomyces lecanii* (out-group). The tree was constructed using concatenated sequences of ITS (see Table 1 for GenBank Acc. Nos.). RAxML bootstrap support values (ML) higher than 50, Bayesian posterior probability (PP) higher than 0.90 and maximum parsimony (MP) bootstrap support values higher than 50 were shown at the nodes (ML/PP/MP). Scale bar indicates 0.4% sequence divergence. Type strains labeled with 'T' at the top-right corner.

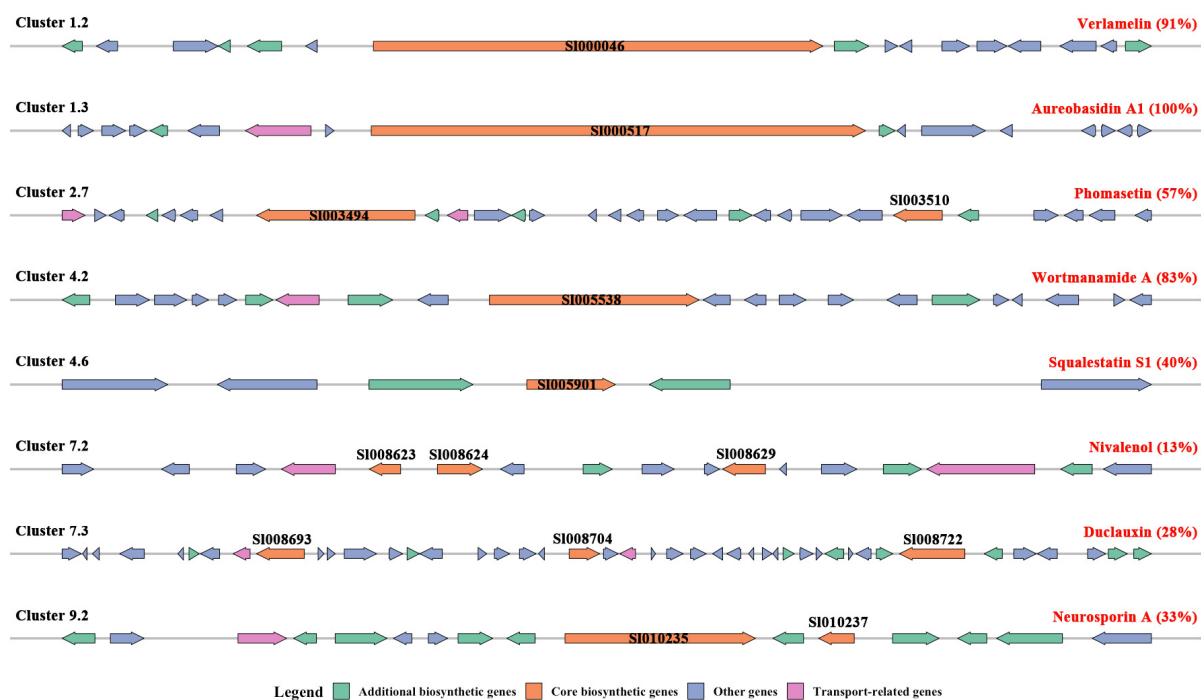

**Figure S4.** Diagram showing composition of the eight biosynthetic gene clusters for known metabolites in *Simplicillium lamellicola* JC-1 based on antiSMASH.

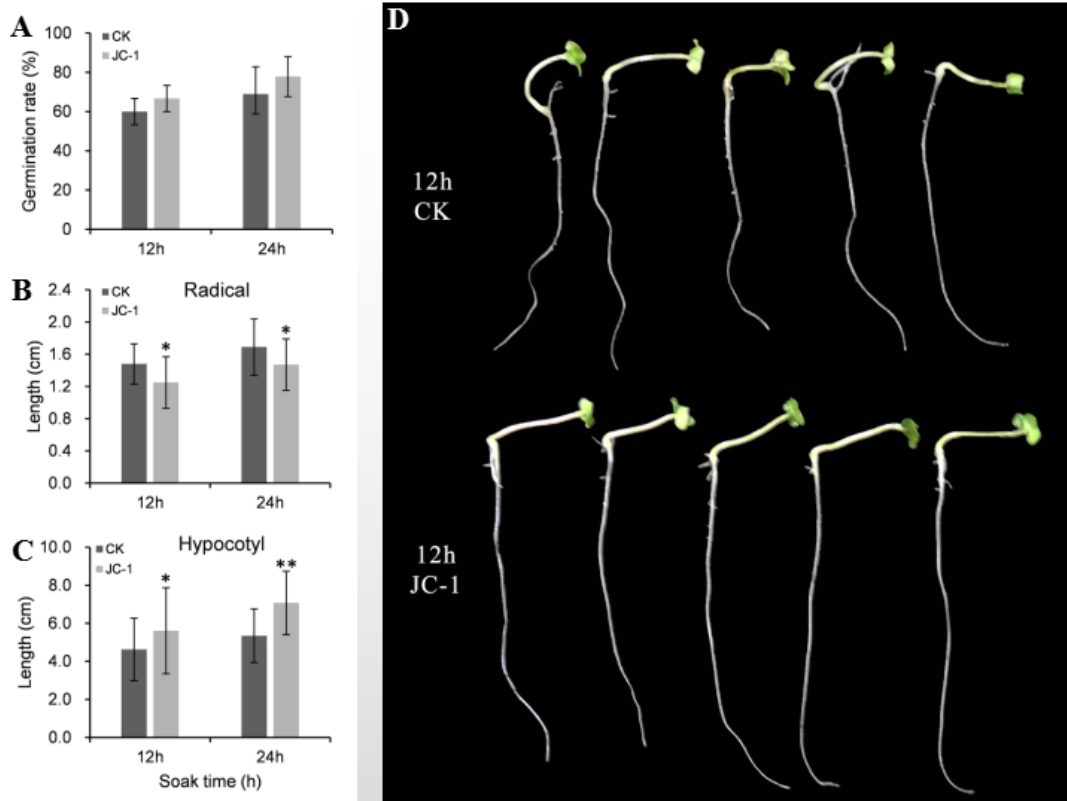

**Figure S5.** Effect of treatment of seeds of oilseed rape with the conidia of *S. lamellicola* JC-1 on seed germination rate and elongation of the radicles and hypocotyls of the resulting seedlings (20°C, 4 d).

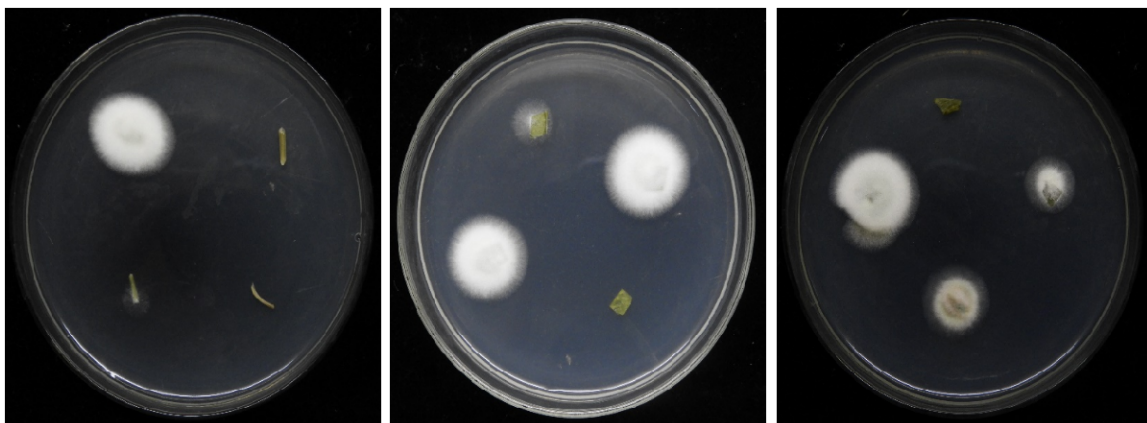

**Figure S6.** Detection of *S. lamellicola* JC-1 in stems (right dish) and leaves (middle and left dishes) of oilseed rape. Note the whitish colonies of *S. lamellicola*.

## SUPPLEMENTARY TABLES

**Table S1** PCR primers and their oligonucleotide sequences

| Locus <sup>1</sup> | Oligonucleotide Sequence (5' to 3') | Annealing Temperature | Reference <sup>2</sup>     |
|--------------------|-------------------------------------|-----------------------|----------------------------|
| ITS                | ITS4: TCCTCCGCTTATTGATATGC          | 49°C                  | White <i>et al.</i> , 1990 |
|                    | ITS5: GGAAGTAAAAGTCGTAACAAGG        |                       |                            |
| SSU                | NS1: GTAGTCATATGCTTGTCTC            | 45°C                  | White <i>et al.</i> , 1990 |
|                    | NS4: CTTCCGTCAATTCCTTTAAG           |                       |                            |
| LSU                | LR0R: GTACCCGCTGAACTTAAGC           | 49°C                  | Vilgalys & Hester, 1990    |
|                    | LR5: ATCCTGAGGGAACTTC               |                       |                            |
| <i>TEF1α</i>       | EF1-983F: GCYCCYGGHCAYCGTGAYTTYAT   | 52°C                  | Rehner & Buckley, 2005     |
|                    | EF1-2218R: ATGACACCRACRGCACRGTYTG   |                       |                            |
| <i>ACT7</i>        | ACT7F: GCTGACCGTATGAGCAAAG          | 49°C                  |                            |
|                    | ACT7R: AAGATGGATGGACCCGAC           |                       |                            |
| <i>CHI</i>         | CHI : FG TAGTCATATGCTTGTCTC         | 47°C                  | Peng <i>et al.</i> , 2020  |
|                    | CHIR: CTTCCGTCAATTCCTTTAAG          |                       |                            |
| <i>NCED3</i>       | NCED3F: CGATTTGCCTTACCAAGTCAG       | 49°C                  |                            |
|                    | NCED3R: TTTATCCCTTCCGGTGAGAA        |                       |                            |
| <i>PR-1</i>        | PR-1F: CATCCCTCGAAAGCTCAAGAC        | 53°C                  |                            |
|                    | PR-1R: CCACTGCACGGGACCTAC           |                       |                            |

<sup>1</sup>ITS = Internal Transcribed Spacer (ITS1-5.8S rDNA-ITS2), SSU = Small Subunit ribosomal RNA gene, LSU = Large Subunit ribosomal RNA gene, *TEF1α* = translation elongation factor 1α, *ACT7* codes for actin, *CHI* codes for chalcone isomerase, *NCED3* codes for 9-cis-epoxycarotenoid dioxygenase, *PR-1* codes for pathogenesis-related protein 1.

<sup>2</sup>Reference: (1) Peng G *et al. Can J Plant Pathol* 2020, 42: 480–492; (2) Rehner SA, and Buckley E. *Mycologia*, 2005, 97: 84–98; (3) Vilgalys R and Hester M. *J. Bacteriol.* 1990, 172: 4238–4246; (4) White TJ *et al. In: PCR Protocols: A Guide to Methods and Applications* (Innis MA *et al.* eds) Academic Press, San Diego, CA, USA, 1990, pp315–322.

**Table S2.** Reagents for PCR amplification of ITS, LSU, SSU and *TEF1a*

| Reagent            | Concentration | Dosage  |
|--------------------|---------------|---------|
| Forward primer     | 20 µmol/L     | 1.0 µL  |
| Reverse primer     | 20 µmol/L     | 1.0 µL  |
| DNA template       | 50 ng/µL      | 1.0 µL  |
| Master Mix         | -             | 12.5 µL |
| ddH <sub>2</sub> O | -             | 9.5 µL  |
| Total volume       | -             | 25.0 µL |

**Table S3.** Thermal program for PCR amplification of ITS, SSU, LSU and *TEF1a*

| Stage                | Temperature | Time   | Cycle          |
|----------------------|-------------|--------|----------------|
| Pre-denaturation     | 95°C        | 3 min  | 1 cycle        |
| Denaturation         | 95°C        | 30 s   | 32 cycles      |
| Annealing            | -           | 30 s   |                |
| Extension            | 72°C        | 1 min  |                |
| Final extension      | 72°C        | 10 min | 1 cycle        |
| Temperature dropping | 16°C        | 5 min  | Not applicable |



**Table S4.** Reaction system for DNA elimination in the RNA extracts.

| Reagent            | Dosage | Temperature | Time   |
|--------------------|--------|-------------|--------|
| RNA                | 2 µg   |             |        |
| 10×DNaseIBuffer    | 2 µL   | 37°C        | 30 min |
| Recombinant DNaseI | 1 µL   |             |        |
| Stop solution      | 1 µL   | 65°C        | 10 min |

**Table S5.** Reagents for RT-PCR to detect expression of defense-related genes.

| Reagent            | Concentration | Dosage  |
|--------------------|---------------|---------|
| Forward primer     | 20 µmol/L     | 1.0 µL  |
| Reverse primer     | 20 µmol/L     | 1.0 µL  |
| cDNA template      | 50 ng/µL      | 1.0 µL  |
| Master Mix         | -             | 12.5 µL |
| ddH <sub>2</sub> O | -             | 9.5 µL  |
| Total volume       | -             | 25.0 µL |

139

**Table S6.** Thermal program for quantitative RT-PCR.

| Temperature                                   | Time  | Cycle |
|-----------------------------------------------|-------|-------|
| 95°C                                          | 3 min | 1     |
| 95°C                                          | 10 s  |       |
| 60°C                                          | 30 s  | 39    |
| 72°C                                          | 30 s  |       |
| 95°C                                          | 1 min | 1     |
| 55°C                                          | 1 min | 1     |
| Melt Curve 55°C to 95°C, increment with 0.5°C | 10 s  | 1     |

140

141 **Table S7.** Genes clusters for biosynthesis of secondary metabolites (SMs) in *Simplicillium*  
 142 *lamellicola* strain JC-1.

| Cluster | Type        | Position (nt)   | Backbone Gene        | Putative Protein                                                | Secondary Metabolite | MIBiG Acc. No. | Similarity |
|---------|-------------|-----------------|----------------------|-----------------------------------------------------------------|----------------------|----------------|------------|
| 1.1     | T1PKS NRPS  | 33680-82407     | SI000016             | Putative lovastatin nonaketide synthase                         | Unknown              | — <sup>c</sup> | —          |
| 1.2     | NRPS        | 131433-196258   | SI000046             | Non-ribosomal peptide synthetase                                | Verlamelin           | BGC0000456     | 100%       |
| 1.3     | NRPS        | 1433867-1503267 | SI000517             | Aureobasidin A1 biosynthesis complex                            | Aureobasidin A1      | BGC0000307     | 100%       |
| 1.4     | NRPS-like   | 1970795-2013061 | SI000693             | NRPS-like enzyme                                                | Unknown              | —              | —          |
| 1.5     | Terpene     | 2109867-2131080 | SI000745             | Isoprenoid synthase                                             | Unknown              | —              | —          |
| 1.6     | NRPS        | 3773786-3821937 | SI001334             | Non-ribosomal peptide synthase                                  | Unknown              | —              | —          |
| 1.7     | NRPS T1PKS  | 3935356-3987606 | SI001394             | Putative hybrid NRPS/PKS enzyme                                 | Unknown              | —              | —          |
| 2.1     | Betalactone | 1033569-1058485 | SI002201<br>SI002202 | Hydroxymethylglutaryl-lyase, Acetoacetyl-synthase               | Unknown              | —              | —          |
| 2.2     | NRPS        | 1435270-1534754 | SI002347<br>SI002349 | Non-ribosomal peptide synthetase, Nonribosomal peptide synthase | Unknown              | —              | —          |
| 2.3     | NRPS-like   | 2397011-2439229 | SI002661             | Oxygen-dependent choline dehydrogenase                          | Unknown              | —              | —          |
| 2.4     | T1PKS       | 2680421-2725247 | SI002765             | Putative polyketide synthase                                    | Unknown              | —              | —          |
| 2.5     | NRPS-like   | 3093698-3134818 | SI002932             | Putative peroxisomal-coenzyme A                                 | Unknown              | —              | —          |

|     |                               |                     |                                  |                                                                                                            |                 |            |     |
|-----|-------------------------------|---------------------|----------------------------------|------------------------------------------------------------------------------------------------------------|-----------------|------------|-----|
|     |                               |                     |                                  | synthetase-like                                                                                            |                 |            |     |
| 2.6 | NRPS                          | 3816434-3867433     | SI003210                         | Nonribosomal peptide synthase                                                                              | Unknown         | —          | —   |
| 2.7 | NRPS<br>T1PKS<br>NRPS-like    | 4644938-4738920     | SI003494<br>SI003510             | Putative equisetin synthetase,<br>Putative Linear gramicidin synthase subunit D                            | Phomasetin      | BGC0001738 | 57% |
| 2.8 | T1PKS                         | 4820789-4868697     | SI003552                         | Polyketide synthase                                                                                        | Unknown         | —          | —   |
| 3.1 | T1PKS                         | 1641267-1679314     | SI004278                         | Methylphloroacetophenone synthase                                                                          | Unknown         | —          | —   |
| 3.2 | Terpene                       | 1,740,519-1,761,688 | SI004310                         | Geranylgeranyl pyrophosphate synthase                                                                      | Unknown         | —          | —   |
| 3.3 | NRPS<br>NRPS-like             | 3,601,494-3,656,816 | SI004994,<br>SI004998            | Non-ribosomal peptide synthetase, Nrps-like enzyme                                                         | Unknown         | —          | —   |
| 3.4 | T1PKS                         | 3674131-3722214     | SI005026                         | Polyketide synthase                                                                                        | Unknown         | —          | —   |
| 4.1 | Terpene                       | 642917-661016       | SI005401                         | Squalene cyclase                                                                                           | Unknown         | —          | —   |
| 4.2 | T1PKS                         | 969343-1014595      | SI005538                         | Polyketide synthase                                                                                        | Wortmanamide A  | BGC0001954 | 83% |
| 4.3 | T1PKS                         | 1184816-1229761     | SI005624                         | Polyketide synthase                                                                                        | Unknown         | —          | —   |
| 4.4 | T1PKS                         | 1365775-1403953     | SI005676                         | Polyketide synthase                                                                                        | Unknown         | —          | —   |
| 4.5 | NRPS<br>T1PKS                 | 1505312-1565249     | SI005729<br>SI005730             | Nonribosomal peptide synthetase-like<br>Lovastatin nonaketide synthase-like                                | Unknown         | —          | —   |
| 4.6 | Terpene                       | 2065671-2087169     | SI005901                         | Squalene synthetase                                                                                        | Squalestatin S1 | BGC0001839 | 40% |
| 4.7 | NRPS                          | 2482414-2543614     | SI006048                         | Non-ribosomal peptide synthetase                                                                           | Unknown         | —          | —   |
| 5.1 | NRPS                          | 635243-679402       | SI006597                         | Nonribosomal peptide synthase                                                                              | Unknown         | —          | —   |
| 5.2 | NRPS<br>T1PKS                 | 2612716-2664965     | SI007294                         | Polyketide synthase                                                                                        | Unknown         | —          | —   |
| 7.1 | NAPAA<br>T1PKS                | 18904-94369         | SI008578<br>SI008589             | Non-ribosomal peptide synthetase,<br>Putative acyl carrier                                                 | Unknown         | —          | —   |
| 7.2 | Fungal-RiPP<br>Terpene        | 128776-171501       | SI008623<br>SI008624<br>SI008629 | Trichodiene synthase,<br>Alpha-1,3-mannosyltransferase<br>Putative Gamma-glutamyltranspeptidase            | Nivalenol       | BGC0001277 | 13% |
| 7.3 | NRPS-like<br>T1PKS            | 303687-415883       | SI008693<br>SI008704<br>SI008722 | Transferase family,<br>Acetyl-CoA synthetase-like,<br>Polyketide synthase<br>Putative polyketide synthase, | Duclauxin       | BGC0001578 | 28% |
| 8.1 | T1PKS<br>NRPS-like,<br>Indole | 330549-393056       | SI009359<br>SI009365<br>SI009366 | Aromatic prenyltransferase,<br>Acetyl-CoA synthetase-like                                                  | Unknown         | —          | —   |
| 8.2 | T1PKS                         | 766436-814788       | SI009509                         | Polyketide synthase                                                                                        | Unknown         | —          | —   |
| 8.3 | NRPS-like                     | 1725699-1771470     | SI009893                         | Amino adipate reductase enzyme                                                                             | Unknown         | —          | —   |

|      |              |               |                      |                                            |               |            |     |
|------|--------------|---------------|----------------------|--------------------------------------------|---------------|------------|-----|
| 9.1  | NRPS-like    | 59244-102327  | SI009957             | Acetyl-CoA synthetase-like protein         | Unknown       | –          | –   |
| 9.2  | T1PKS Indole | 738964-786458 | SI010235<br>SI010237 | Polyketide synthase, Prenyltransferase PT1 | Neurosporin A | BGC0002729 | 33% |
| 10.1 | NRPS-like    | 381851-425168 | SI010404             | Nonribosomal peptide synthetase            | Unknown       | –          | –   |

<sup>a</sup>The codes for the gene clusters were named after their positions in the contigs for the genome of JC-1;

<sup>b</sup>T1PKS, Type I polyketide synthase; NRPS, Non-ribosomal peptide synthetase; Terpene, Terpene cluster; Betalactone, beta-lactone containing protease inhibitor; NAPAA, non-alpha poly-amino acids like e-Polylysine; Fungal-RiPP, Fungal RiPP with POP or UstH peptidase types and a modification; Indole, Indole cluster.

<sup>c</sup>–, Not applicable.

**Table S8.** Putative genes of the verlamelin biosynthesis gene cluster in *S. lamellicola* JC-1.

| Gene in JC-1 | Predicted function             | Homolog in<br><i>Lecanicillium</i> HF627<br>(GenBank Acc. No.) | Identity |     |
|--------------|--------------------------------|----------------------------------------------------------------|----------|-----|
|              |                                |                                                                | nt       | aa  |
| SI000046     | Non-ribosomal peptide synthase | <i>vImS</i> (AB862312)                                         | 90%      | 92% |
| SI000045     | Thioesterase                   | <i>vImB</i> (AB862314)                                         | 92%      | 96% |
| SI000044     | AMP-dependent ligase           | <i>vImC</i> (AB862315)                                         | 90%      | 96% |
| SI005221     | Fatty acid hydroxylase         | <i>vImA</i> (AB862313)                                         | 51%      | 47% |

Note: Three genes (SI000044, SI000045 and SI000046) are located in Contig No. 01, whereas the gene SI005221 is located in Contig No. 4.
